# Supplementary material for: Anatomy of a Flash Flood in a Hyperarid Environment: From Atmospheric Masses to Sediment Dispersal in the Sea
Source: Copernicus journal article supplement (doi:10.5194/nhess-25-3201-2025), 2025-09-10
Supplement: Supplementary file 1 [file nhess-25-3201-2025-supplement.zip]

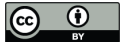

*Supplement of*

**Anatomy of a Flash Flood in a Hyperarid Environment: From Atmospheric Masses to Sediment Dispersal in the Sea**

**Akos Kalman et al.**

*Correspondence to:* Akos Kalman (akoss.kalman@gmail.com)

- nhess-25-3201-2025-supplement-title-page.pdf
- Figure S1.jpg
- Figure S2.jpg
- Figure S3.jpg
- Figure S4.jpg
- Figure S5.jpg
- Supplementary-Figures-Kalman-et-al-EGU.pdf
- Video S1.gif

The copyright of individual parts of the supplement might differ from the article licence.
