# Supplementary material for: Anatomy of a Flash Flood in a Hyperarid Environment: From Atmospheric Masses to Sediment Dispersal in the Sea
Source: Copernicus journal article supplement (doi:10.5194/nhess-25-3201-2025), 2025-09-10
Supplement: Supplementary file 2 [file nhess-25-3201-2025-supplement.zip]

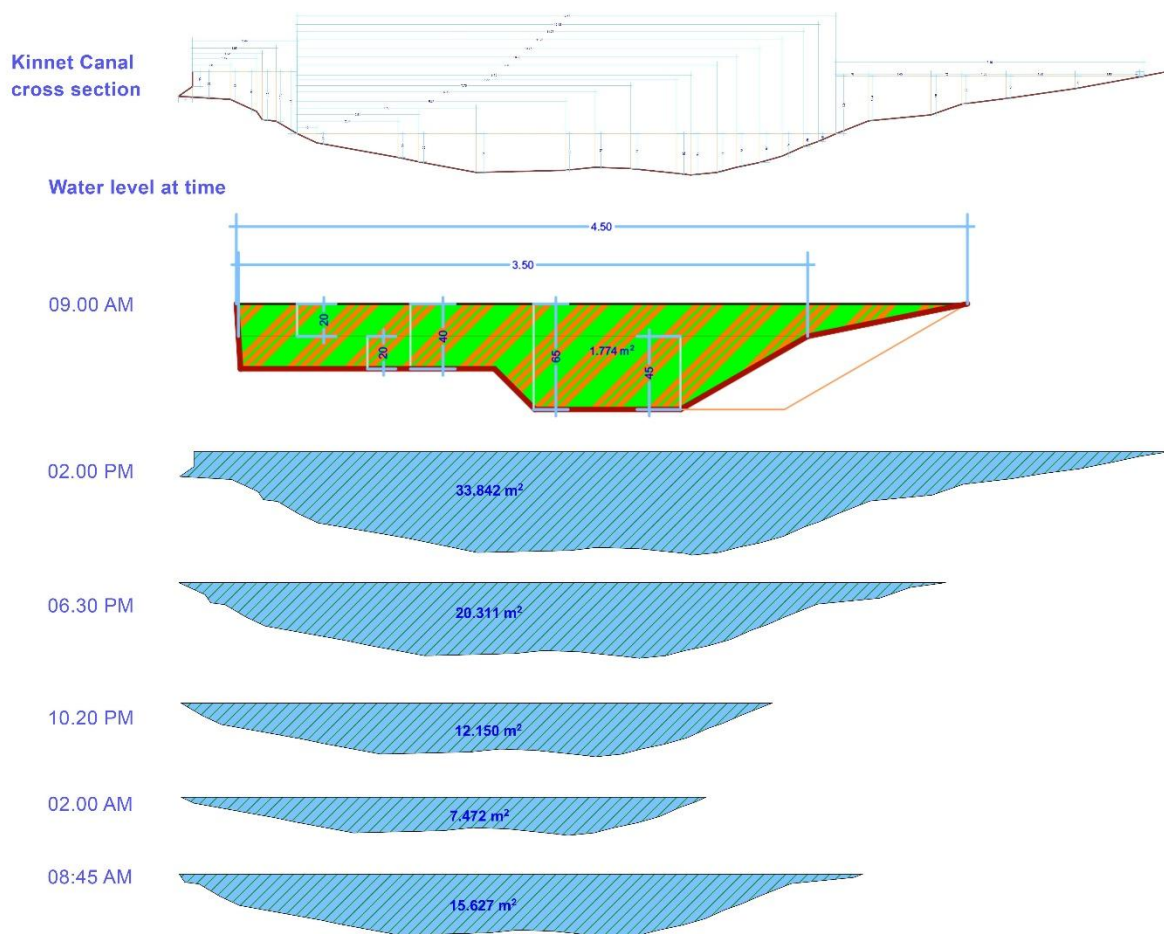

**Figure S1: Cross-section areas (m<sup>2</sup>) of the Kinnet Canal measured at 3-hour intervals throughout the flood event.** Flood levels along the banks were recorded regularly during the event, allowing for post-flood reconstruction of water stage and corresponding cross-sectional area over time.

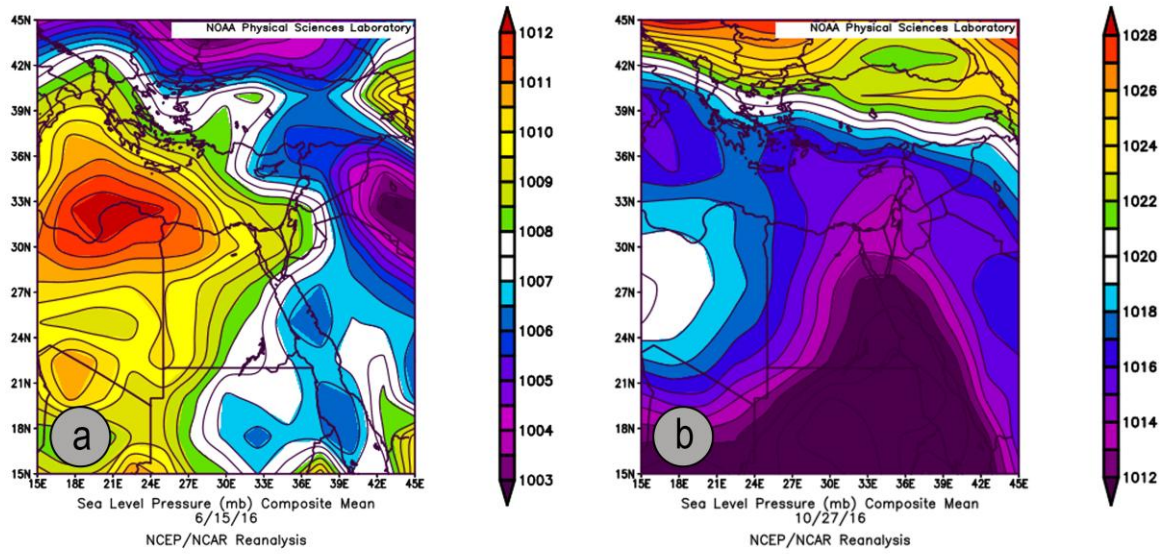

**Figure S2: Sea-level pressure patterns over the Red Sea in two cases.** (a) A summer scenario without the presence of the Red Sea Trough (RST). (b) A case where the RST is present on the flooding day in Eilat, illustrating its influence on regional pressure distribution.

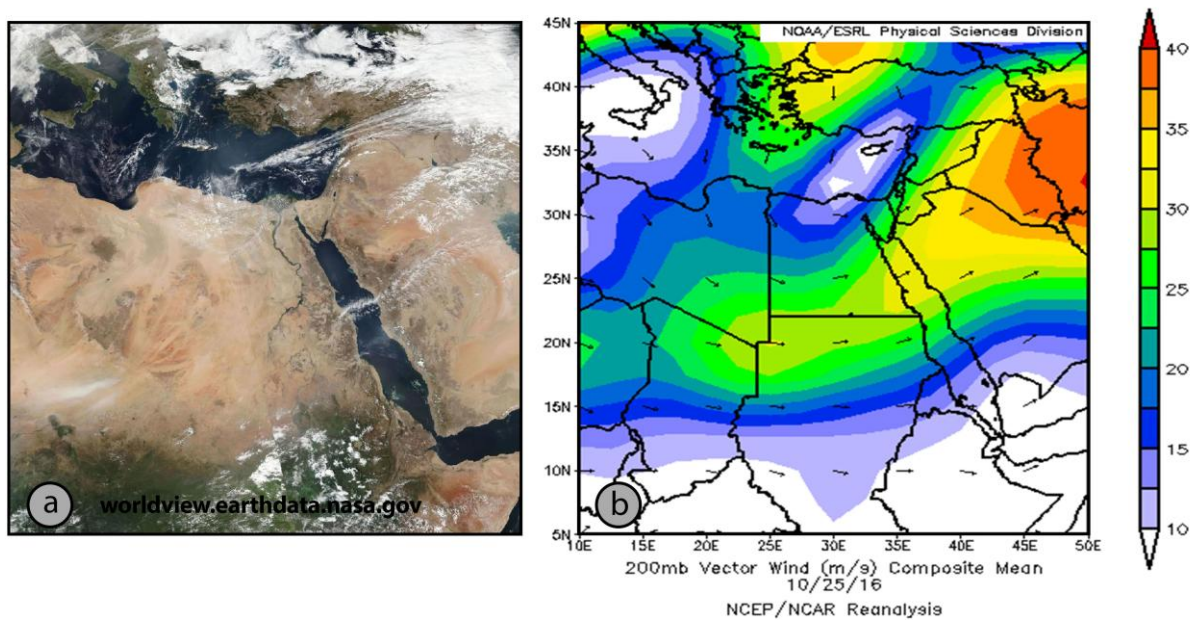

**Figure S3: Influence of the subtropical jet (STJ) on cloud formation.** (a) Satellite image showing cloud cover over the mid-Red Sea. (b) 200 hPa vector wind composite map indicating that the observed clouds formed due to the intensification of the STJ.

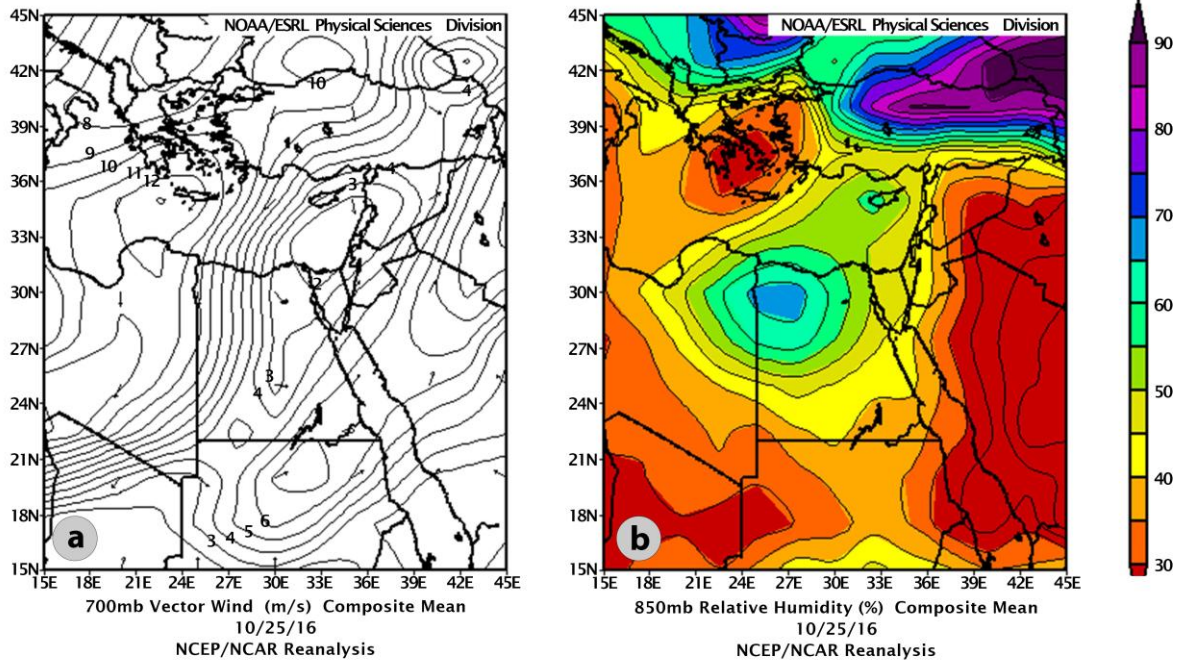

**Figure S4: Moisture transport towards the Red Sea.** (a) 700 hPa vector wind composite map showing the wind flow patterns. (b) 850 hPa moisture map indicating that moisture was transported at this level from the Libya-Egypt border toward the Red Sea.

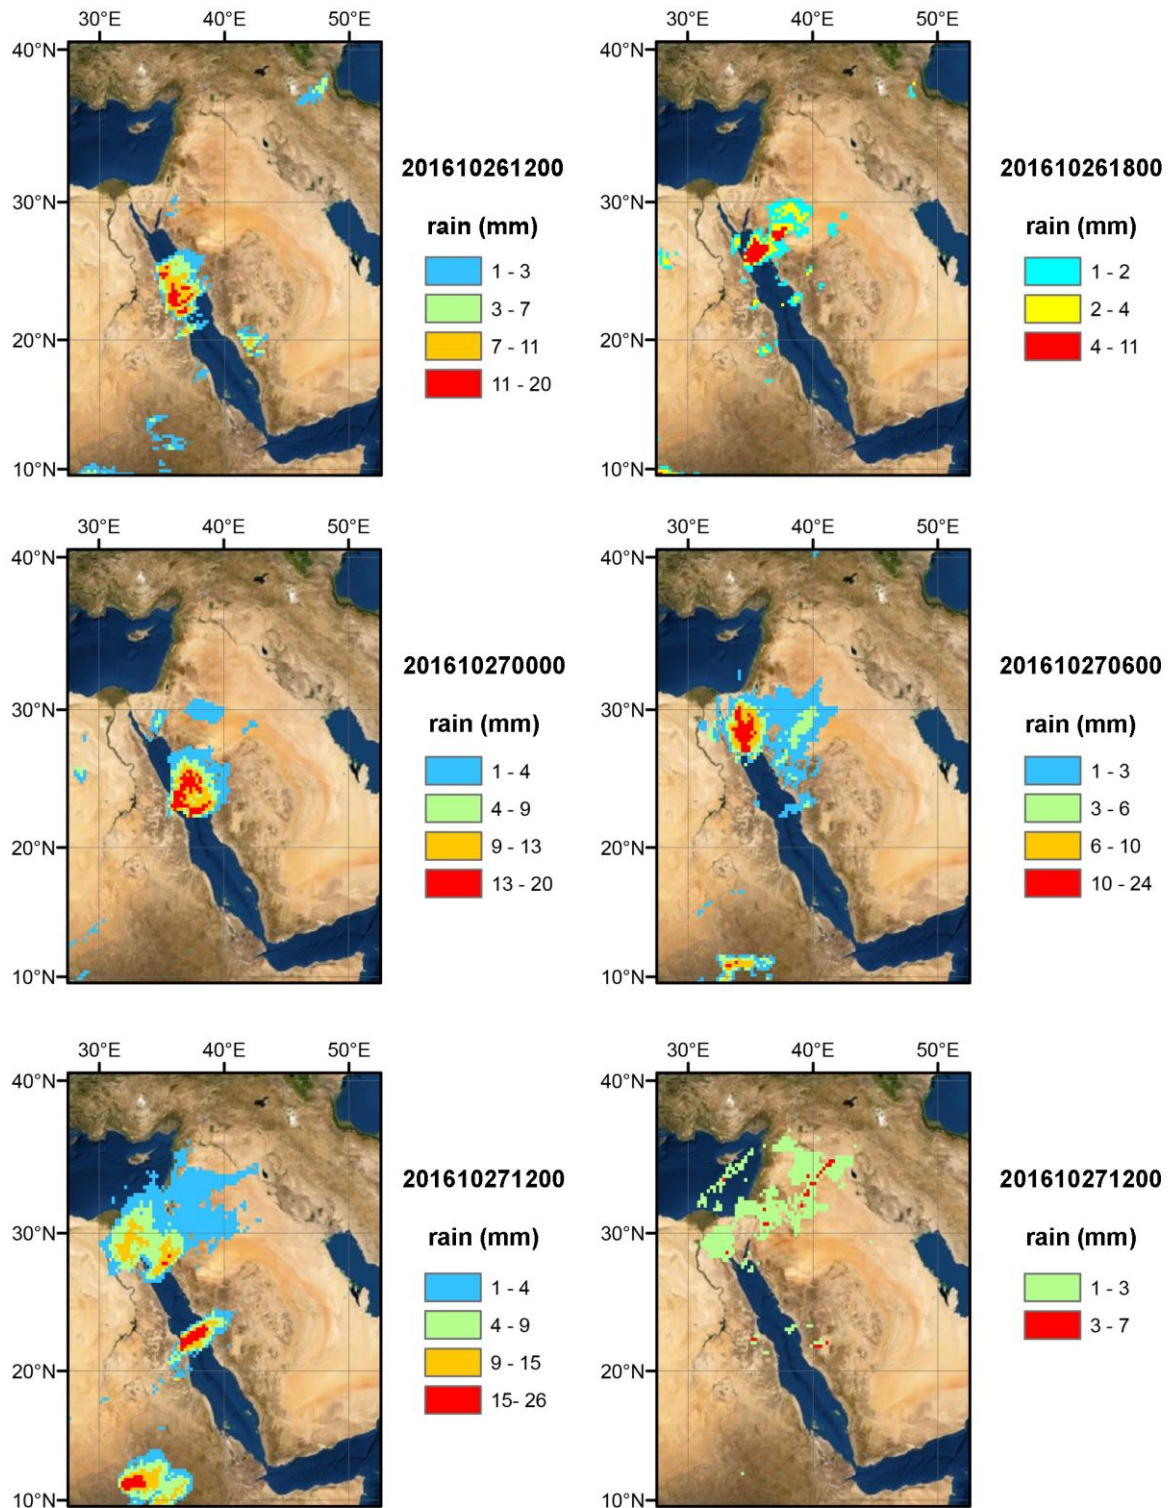

**Figure S5: Advancement of precipitation centers.** PERSIANN data with a  $0.25^\circ \times 0.25^\circ$  spatial resolution showing the movement of precipitation centers from the mid-Red Sea towards the northern tip of the Gulf of Aqaba-Eilat. Over the course of a day, these precipitation centers advanced approximately 1000 km, reaching Eilat, where the rainstorm triggered a flash flood that eventually drained and transported sediment into the sea.
